# Supplementary material
Source: HighWire-hosted journal article supplement (https://wjps.bmj.com/content/5/1/e000344)
Supplement: inline-supplementary-material-2 [file inline-supplementary-material-2.pdf]

PubMed (1900/00/00-2020/08/18)

(((((Biliary atresia[MeSH Terms]) OR (((((((((Biliary atresia[Title/Abstract]) OR (Atresia, Biliary[Title/Abstract])) OR (Intrahepatic Biliary Atresia[Title/Abstract])) OR (Atresia, Intrahepatic Biliary[Title/Abstract])) OR (Biliary Atresia, Intrahepatic[Title/Abstract])) OR (Biliary Atresia, Extrahepatic[Title/Abstract])) OR (Atresia, Extrahepatic Biliary[Title/Abstract])) OR (Extrahepatic Biliary Atresia[Title/Abstract])) OR (Idiopathic Extrahepatic Biliary Atresia[Title/Abstract])) OR (Familial Extrahepatic Biliary Atresia[Title/Abstract]))) AND (((((((((((Vascular Endothelial Growth Factor-A[Title/Abstract]) OR (VEGF-A[Title/Abstract])) OR (VEGFA[Title/Abstract])) OR (Vasculotropin[Title/Abstract])) OR (VEGF[Title/Abstract])) OR (Vascular Endothelial Growth Factor[Title/Abstract])) OR (Vascular Permeability Factor[Title/Abstract])) OR (Permeability Factor, Vascular[Title/Abstract])) OR (Glioma-Derived Vascular Endothelial Cell Growth Factor[Title/Abstract])) OR (Glioma Derived Vascular Endothelial Cell Growth Factor[Title/Abstract])) OR (GD-VEGF[Title/Abstract])) OR ((Vascular Endothelial Growth Factor A[MeSH Terms]) OR (Vascular Endothelial Growth Factors[MeSH Terms]))) AND (("1900/01/01"[Date - Publication] : "2020/08/18"[Date - Publication]))

Embase (1900/00/00-2020/08/18)

| No. | Query                                                                                          | Results | Date      |
|-----|------------------------------------------------------------------------------------------------|---------|-----------|
| #30 | #12 AND #27 AND [1-1-1900]/sd NOT [18-8-2020]/sd                                               | 28      | 20-Aug-20 |
| #29 | #12 AND #27 AND [1-1-1900]/sd NOT [19-8-2020]/sd                                               | 28      | 20-Aug-20 |
| #28 | #12 AND #27                                                                                    | 28      | 20-Aug-20 |
| #27 | #13 OR #14 OR #15 OR #16 OR #17 OR #18 OR #19 OR #20 OR #21 OR #22 OR #23 OR #24 OR #25 OR #26 | 151830  | 20-Aug-20 |
| #26 | vascular endothelial growth factors':ti,ab                                                     | 1250    | 20-Aug-20 |
| #25 | vascular endothelial growth factor a':ti,ab                                                    | 4416    | 20-Aug-20 |
| #24 | gd-vegf':ti,ab                                                                                 | 2       | 20-Aug-20 |
| #23 | glioma derived vascular endothelial cell growth factor':ti,ab                                  | 1       | 20-Aug-20 |
| #22 | glioma-derived vascular endothelial cell growth factor':ti,ab                                  | 1       | 20-Aug-20 |
| #21 | permeability factor, vascular':ti,ab                                                           | 123     | 20-Aug-20 |
| #20 | vascular permeability factor':ti,ab                                                            | 687     | 20-Aug-20 |
| #19 | vascular endothelial growth factor':ti,ab                                                      | 74734   | 20-Aug-20 |
| #18 | vegf':ti,ab                                                                                    | 98548   | 20-Aug-20 |
| #17 | vasculotropin':ti,ab                                                                           | 13      | 20-Aug-20 |
| #16 | vegfa':ti,ab                                                                                   | 12762   | 20-Aug-20 |
| #15 | vegf-a':ti,ab                                                                                  | 9885    | 20-Aug-20 |

|     |                                                                  |        |           |
|-----|------------------------------------------------------------------|--------|-----------|
| #14 | vascular endothelial growth factor-a':ti,ab                      | 4416   | 20-Aug-20 |
| #13 | vasculotropin'/exp                                               | 109406 | 20-Aug-20 |
| #12 | #1 OR #2 OR #3 OR #4 OR #5 OR #6 OR #7 OR #8 OR #9 OR #10 OR #11 | 8458   | 20-Aug-20 |
| #11 | familial extrahepatic biliary atresia':ti,ab                     | 5      | 20-Aug-20 |
| #10 | idiopathic extrahepatic biliary atresia':ti,ab                   | 1      | 20-Aug-20 |
| #9  | extrahepatic biliary atresia':ti,ab                              | 615    | 20-Aug-20 |
| #8  | atresia, extrahepatic biliary':ti,ab                             | 5      | 20-Aug-20 |
| #7  | biliary atresia, extrahepatic':ti,ab                             | 1      | 20-Aug-20 |
| #6  | biliary atresia, intrahepatic':ti,ab                             | 7      | 20-Aug-20 |
| #5  | atresia, intrahepatic biliary':ti,ab                             | 0      | 20-Aug-20 |
| #4  | intrahepatic biliary atresia':ti,ab                              | 34     | 20-Aug-20 |
| #3  | atresia, biliary':ti,ab                                          | 27     | 20-Aug-20 |
| #2  | biliary atresia':ti,ab                                           | 6581   | 20-Aug-20 |
| #1  | bile duct atresia'/exp                                           | 7634   | 20-Aug-20 |

## CBM (1900-2020)

("胆道闭锁"[摘要]) AND (("血管内皮生长因子 A"[摘要] OR "血管内皮生长因子"[摘要] OR "VEGFA"[摘要] OR "VEGF"[摘要] OR "Vascular Endothelial Growth Factor A"[摘要] OR "Vascular Endothelial Growth Factors"[摘要] OR "Vascular Endothelial Growth Factor"[摘要]) AND 1900-2020[日期])
